# Supplementary material for: LXRα Regulates ChREBPα Transactivity in a Target Gene-Specific Manner through an Agonist-Modulated LBD-LID Interaction
Source: Cells. 2020 May 13;9(5):1214. doi: 10.3390/cells9051214 (PMC7290792; doi:10.3390/cells9051214)
Supplement: Supplementary file 1 [file cells-09-01214-s001.pdf]

## **Supplementary Data**

### **LXR $\alpha$ regulates ChREBP $\alpha$ transactivity in a target gene-specific manner through an agonist-modulated LBD-LID interaction**

Qiong Fan<sup>1</sup>, Rikke Christine Nørgaard<sup>2</sup>, Ivar Grytten<sup>3</sup>, Cecilie Maria Ness<sup>2</sup>, Christin Lucas<sup>2</sup>, Kristin Vekterud<sup>1</sup>, Helen Soedling<sup>2</sup>, Jason Matthews<sup>2</sup>, Roza Berhanu Lemma<sup>4</sup>, Odd Stokke Gabrielsen<sup>4</sup>, Christian Bindsbøll<sup>1</sup>, Stine Marie Ulven<sup>2</sup>, Hilde Irene Nebb<sup>2</sup>, Line Mariann Grønning-Wang<sup>2</sup> and Thomas Sæther<sup>1</sup>.

<sup>1</sup>Department of Molecular Medicine, <sup>2</sup>Department of Nutrition, Institute of Basic Medical Sciences,

<sup>3</sup>Department of Informatics, <sup>4</sup>Department of Biosciences, University of Oslo, N-0317 Oslo, Norway

Corresponding author:

Thomas Sæther, Department of Molecular Medicine, Institute of Basic Medical Sciences, University of Oslo, N-0317 Oslo, Norway. Telephone: +47-22851510. E-mail: [thomas.sather@medisin.uio.no](mailto:thomas.sather@medisin.uio.no)

**Supplemental Table S1. Cloning primers sequences.**

| <b>Plasmid</b>                          | <b>Forward primer (5' – 3')</b>                | <b>Reverse primer (5' – 3')</b>                |
|-----------------------------------------|------------------------------------------------|------------------------------------------------|
| hLXR $\alpha$ -DBD-mutant               | CTACAATGTTCTGAGCGCCGAG<br>GGCGCCAAGGGATTCTTCCG | CGGAAGAATCCCTTGGCGCCCT<br>CGGCGCTCAGAACATTGTAG |
| ChREBP $\beta$ -exon1b-luc<br>E-box-del | GTGCCTCCTTCTCTCCTTAGGA<br>TGGCAGCCGCTCCTCAGGC  | GCCTGAGGAGCGGCTGCCATCC<br>TAAGGAGAGAAGGAGGCAC  |
| ChREBP $\beta$ -exon1b-luc<br>DR4-del   | GTCTGCTCTACCCTGAGTCCTC<br>CCTAAGCTTCTCTTCTCTTC | GAAGAGAAGAGAAGCTTAGGG<br>AGGACTCAGGGTAGAGCAGAC |
| ChREBP $\alpha$ -LID                    | AATTCAGATCTATGGACTACAA<br>GG                   | ATTCAAGCTTACATCACCACCT<br>CGATGCGC             |

**Supplemental Table S2. SYBR primers sequences.**

| <b>Gene name</b> | <b>Forward primer (5' – 3')</b> | <b>Reverse primer (5' – 3')</b> |
|------------------|---------------------------------|---------------------------------|
| <i>Acacb</i>     | TCCTTCCAGAACTCCTCCCG            | GACATGCTGGGCCTCATAGT            |
| <i>Chrebpa</i>   | CGACACTCACCCACCTCTTC            | TTGTTTCAGCCGGATCTTGTC           |
| <i>Chrebpb</i>   | TCTGCAGATCGCGTGGAG              | CTTGTCCCGGCATAGCAAC             |
| <i>Fasn</i>      | TGCACCTCACAGGCATCAAT            | GTCCCACTTGATGTGAGGGG            |
| <i>Lpk</i>       | CAGCAGTATGGAAGGGCCAG            | AGTTGCTGCTGCTGGAAGAA            |
| <i>Rgs16</i>     | GGGCTCACCACATCTTTGAC            | TTGGTCAGTTCTCGGGTCTC            |
| <i>Scd1</i>      | AAAGCCGAGAAGCTGGTGAT            | TACAAAAGTCTCGCCCCAGC            |
| <i>Tbp</i>       | GCACAGGAGCCAAGAGTGAA            | TAGCTGGGAAGCCCAACTTC            |
| <i>Txnip</i>     | AGGGTCTCAGCAGTGCAAAC            | GGCCTCATGATCACCATCTC            |

**Supplemental Table S3. ChIP primers sequences.**

| <b>Gene name</b> | <b>Forward primer (5' – 3')</b> | <b>Reverse primer (5' – 3')</b> |
|------------------|---------------------------------|---------------------------------|
| <i>Synthetic</i> | ATAGGCTGTCCCCAGTGCAA            | GGCTTTACCAACAGTACCGGA           |
| <i>Lpk</i>       | CACTCCCGTGGTTCCTGG              | GGCACAGACGAGATCAGTCC            |
| <i>Fasn</i>      | TGCTTGGTCACACTGGAAACT           | GCAGCGACACGGACCT                |
| <i>Scd1</i>      | GAAGCTCACCTCTTGGAGCA            | GAAGTCCACGCTCGATCTCA            |
| <i>Txnip</i>     | ACAACAACCATTTTCCCCGC            | CTCCAACCAATCAGCGAGGC            |

# Supplemental Figure S1

A.

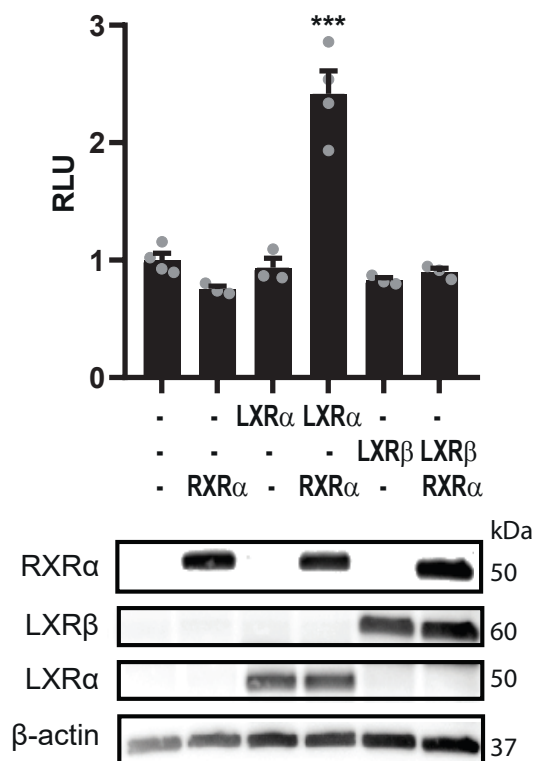

B.

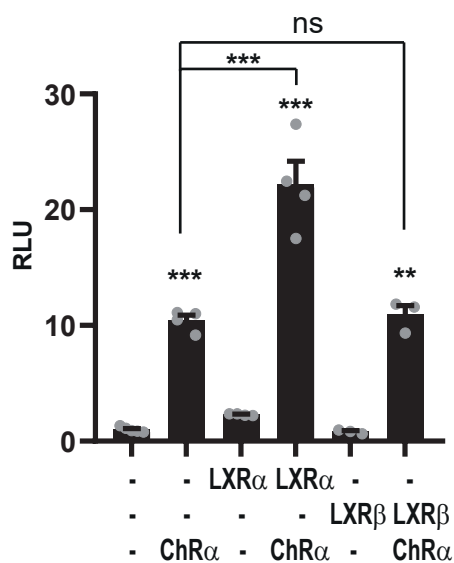

C. ChREBP $\beta$ -exon1b-luc

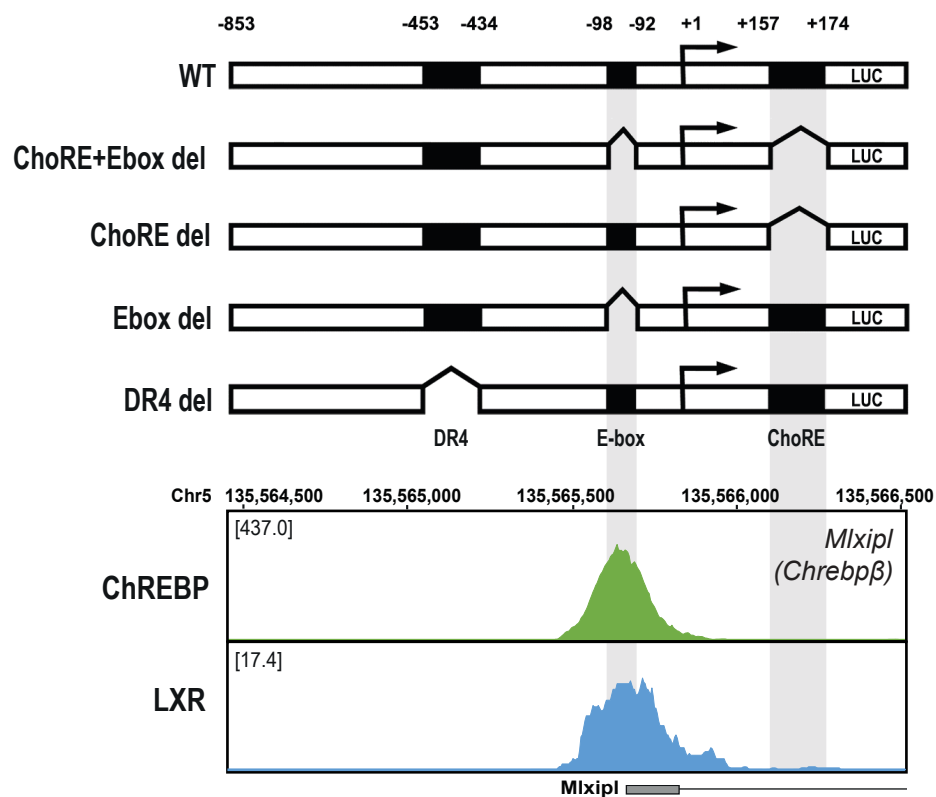

D.

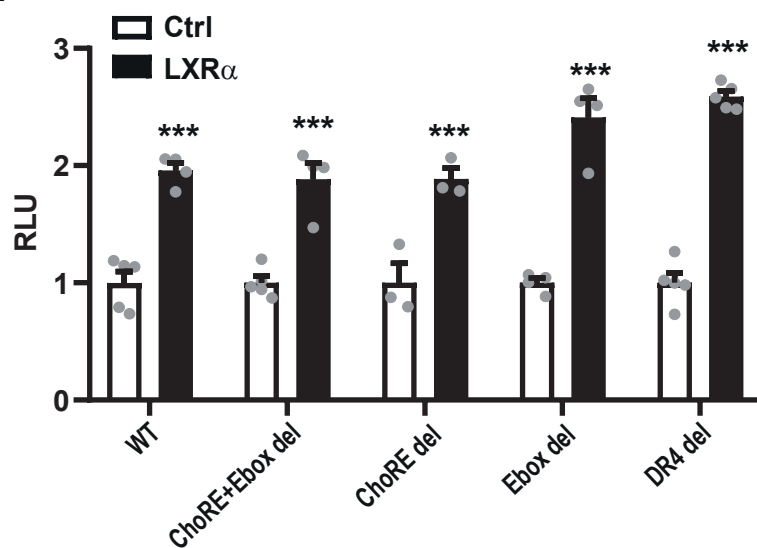

E.

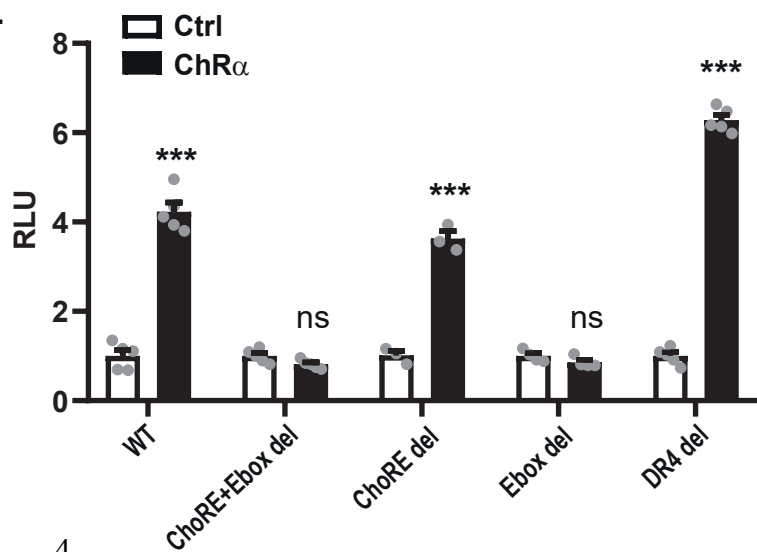

## Supplemental Figure S1.

**A. Top panel:** Huh7 cells cultured in 25 mM glucose were transfected with a *Chrebpβ*-driven luciferase reporter, and plasmids expressing LXRα, LXRβ with or without RXRα. The Renilla luciferase reporter pRL-CMV was used as internal control. Dual luciferase reporter assays were performed 24 hours post transfection. **Bottom panel:** Corresponding lysates were immunoblotted with antibodies against LXRα, LXRβ and RXRα, and β-actin as loading control. **B.** Huh7 cells cultured in 25 mM glucose were transfected with a *Chrebpβ*-driven luciferase reporter, and plasmids expressing LXRα/RXRα or LXRβ/RXRα with or without ChREBPα/Mlxγ. The Renilla luciferase reporter pRL-CMV was used as internal control. Dual luciferase reporter assays were performed 24 hours post transfection. **C. Top panel:** Schematic representation of the *Chrebpβ*-driven luciferase reporters (*Chrebpβ*-exon1b-luc). **Bottom panel:** Browser view of LXR and ChREBP tracks on the *Mlx1pl* (*Chrebpβ*) promoter. Square brackets indicate the scale maxima of ChIP/input ratios. DR4, direct repeat 4, potential LXRE; E-box, enhancer box; ChoRE, carbohydrate response element. **D.** Huh7 cells cultured in 25 mM glucose were transfected with the different *Chrebpβ*-driven luciferase reporters in **C**, as indicated and plasmids expressing LXRα or empty vector (Ctrl), followed by GW3965 treatment for 18 hours (10 μM). The Renilla luciferase reporter pRL-CMV was used as internal control. Dual luciferase reporter assays were performed 24 hours post transfection. **E.** Huh7 cells cultured in 25 mM glucose were transfected with the different *Chrebpβ*-driven luciferase reporters in **C**, as indicated and plasmids expressing ChREBPα or empty vector (Ctrl). The Renilla luciferase reporter pRL-CMV was used as internal control. Dual luciferase reporter assays were performed 24 hours post transfection. Data are presented as mean ± SEM (n=3-5). Significant differences are shown as \*\*p < 0.01, \*\*\*p < 0.001 compared to control within the same group. ns, not significant.

## Supplemental Figure S2

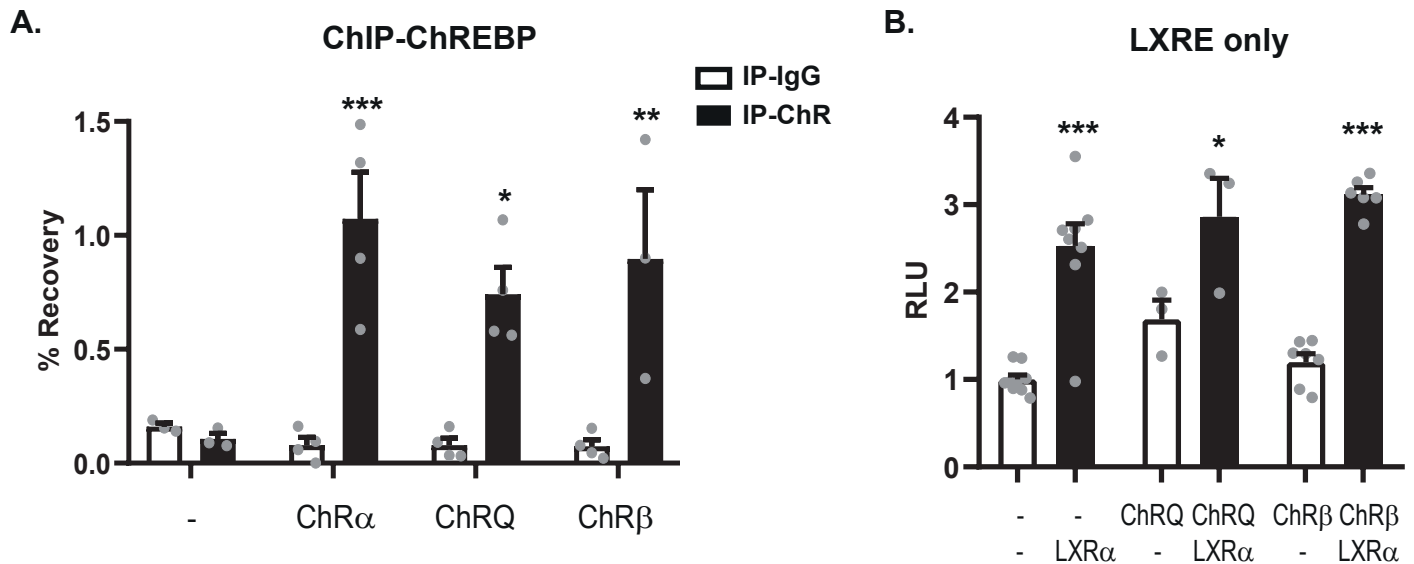

### Supplemental Figure S2.

**A.** Huh7 cells cultured in 25 mM glucose were transfected with the with synthetic luciferase reporter containing ChoREs and LXREs and plasmids expressing ChREBP $\alpha$ , ChREBP-Q, or ChREBP $\beta$ , together with Mlx $\gamma$ . ChREBP binding to the ChoRE were detected by ChIP using antibodies against ChREBP or IgG as control. Data are presented as mean  $\pm$  SEM (n=3). Significant differences are shown as \* $p < 0.05$ , \*\* $p < 0.01$  compared to IgG. **B.** Huh7 cells cultured in 25 mM glucose were transfected with the with synthetic luciferase reporter containing LXRE-only and plasmids expressing ChREBP $\alpha$ , ChREBP-Q, or ChREBP $\beta$ , together with Mlx $\gamma$ , with or without LXR $\alpha$ /RXR $\alpha$ . The Renilla luciferase reporter pRL-CMV was used as internal control. Dual luciferase reporter assays were performed 24 hours post transfection. Data are presented as mean  $\pm$  SEM (n=3-6). Significant differences are shown as \*\*\* $p < 0.001$  compared to control within the same ChREBP isoform transfection. ns, not significant.

**Supplemental Figure S3**

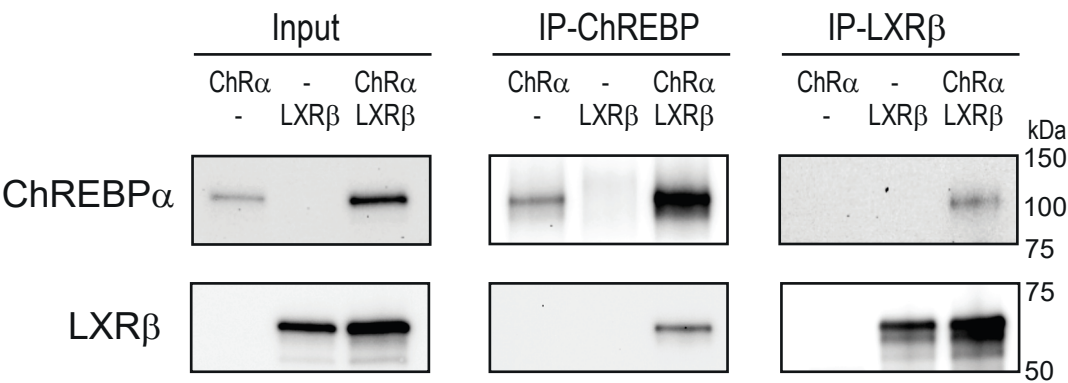

**Supplemental Figure S3.**

CoIP of ChREBP $\alpha$  and LXR $\beta$  expressed in COS-1 cells cultured in 25 mM glucose. Lysates were immunoprecipitated with ChREBP or LXR $\beta$  antibodies, and input and immunoprecipitated proteins immunoblotted with the same antibodies (n=3). One representative western blot is shown.

Supplemental Figure S4

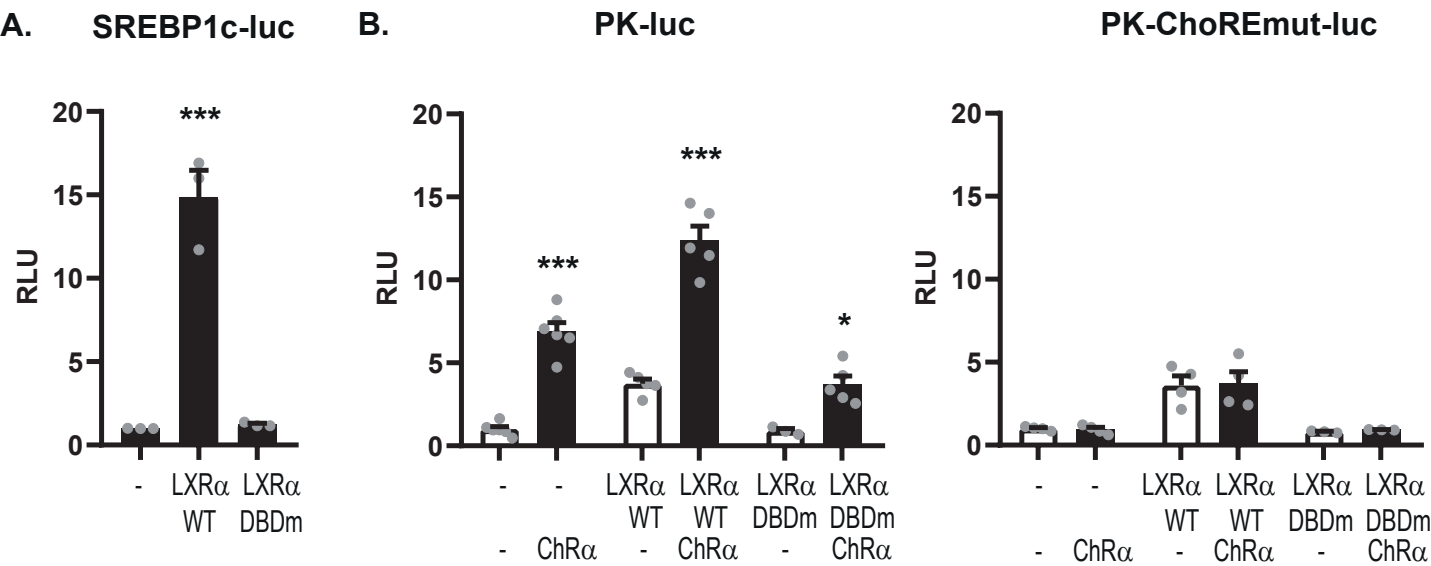

Supplemental Figure S4.

**A.** Huh7 cells cultured in 25 mM glucose were transfected with a *Srebp1c*-driven luciferase reporter and plasmids expressing LXRα wild-type or DNA binding mutant C115A/C118A (LXRα DBDm) together with RXRα. The Renilla luciferase reporter pRL-CMV was used as internal control. Dual luciferase reporter assays were performed 24 hours post transfection. **B.** Huh7 cells cultured in 25 mM glucose were transfected with a *Lpk*-driven luciferase wild-type reporter (PK-luc) or one where the ChoRE had been mutated (PK-ChoREmut-luc), and plasmids expressing ChREBPα/Mlxγ with or without LXRα/RXRα or LXRα DBDm/RXRα. The Renilla luciferase reporter pRL-CMV was used as internal control. Dual luciferase reporter assays were performed 24 hours post transfection. Data are presented as mean ± SEM (n=3-6). Significant differences are shown as \*p < 0.05, \*\*\*p < 0.001 compared to control within the same transfection group.

# Supplemental Figure S5

## A. ChREBPβ-exon1b-luc

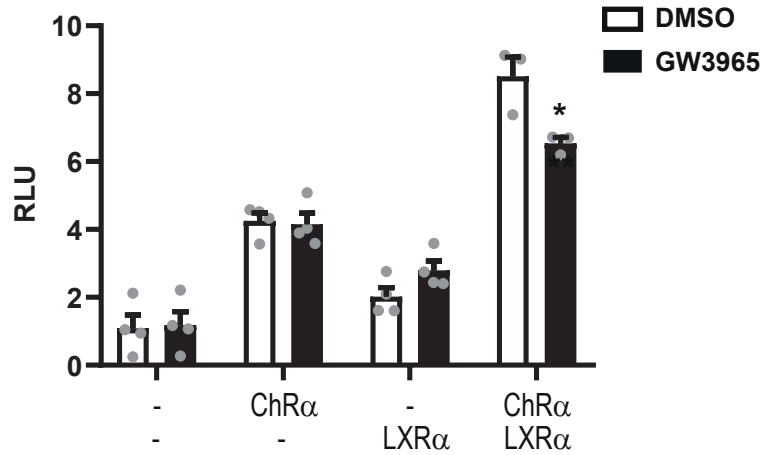

## PK-luc

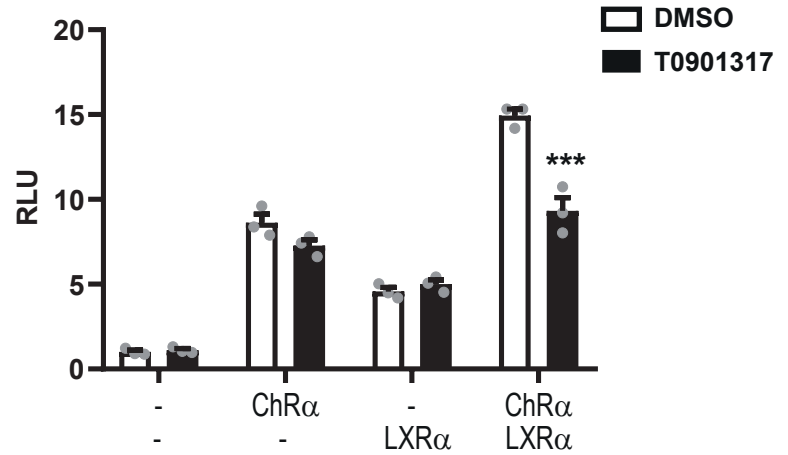

## B. Acacb

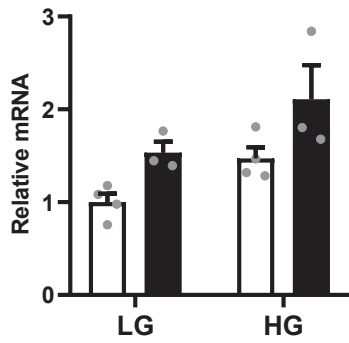

## Fasn

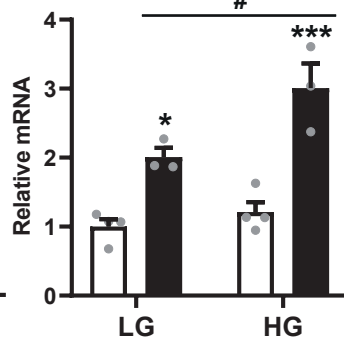

## Chrebpβ

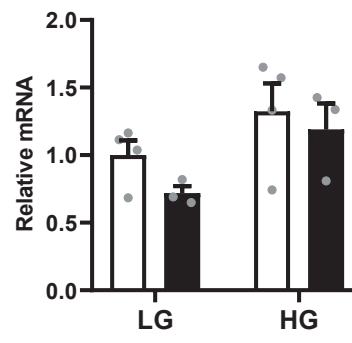

## Lpk

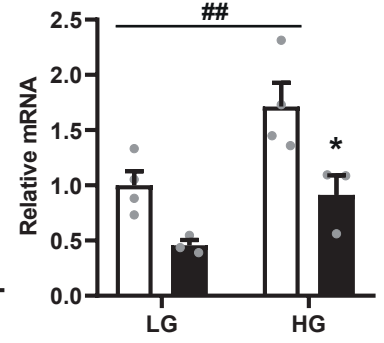

## Scd1

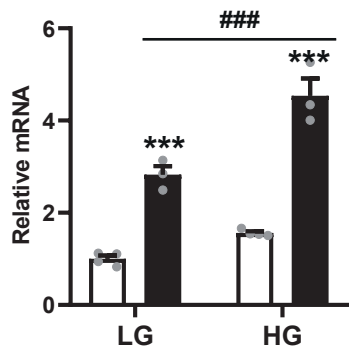

□ DMSO  
■ T0901317

## Txnip

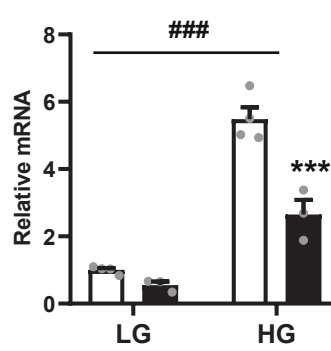

## Rgs16

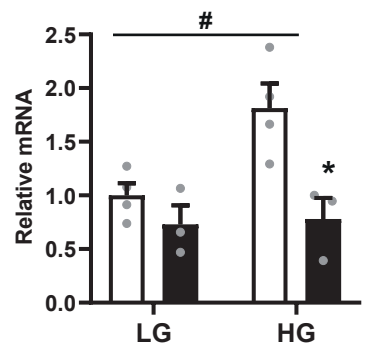

### Supplemental Figure S5.

**A.** Huh7 cells cultured in 25 mM glucose were transfected with a *Chrebpβ* (left panel) or *Lpk*-driven luciferase reporter (right panel), and plasmids expressing LXRα/RXRα with or without ChREBPα/Mlxγ, followed by DMSO (0.1%), GW3965 (1 μM) or T0901317 (5 μM) treatment for 18 hours. The Renilla luciferase reporter pRL-CMV was used as internal control. Dual luciferase reporter assays were performed 24 hours post transfection. Data are presented as mean ± SEM (n=3-4). Significant differences are shown as \*\*p < 0.01, \*\*\*p < 0.001 compared to DMSO within the same group. **B.** Mouse primary hepatocytes were isolated and cultured in either 1 mM glucose (LG) or 25 mM glucose (HG) for 24 hours. For the last 18 hours the cells were treated with either DMSO (0.1%) or T0901317 (10 μM). Expression of DNL genes *Acacb*, *Fasn*, *Scd1* and ChREBP-specific target genes *Chrebpβ* (*Mlxiplβ*), *Lpk* (*Pklr*), *Txnip* and *Rgs16* were analyzed by quantitative RT-PCR, normalized to *Tbp* and the control group set to 1. Data are presented as mean ± SEM (n=3-4). Significant differences are shown as \*p < 0.05, \*\*p < 0.01, \*\*\*p < 0.001 compared to DMSO within the same glucose treatment, and #p < 0.05, ##p < 0.01, ###p < 0.001 between LG and HG groups.

Supplemental Figure S6

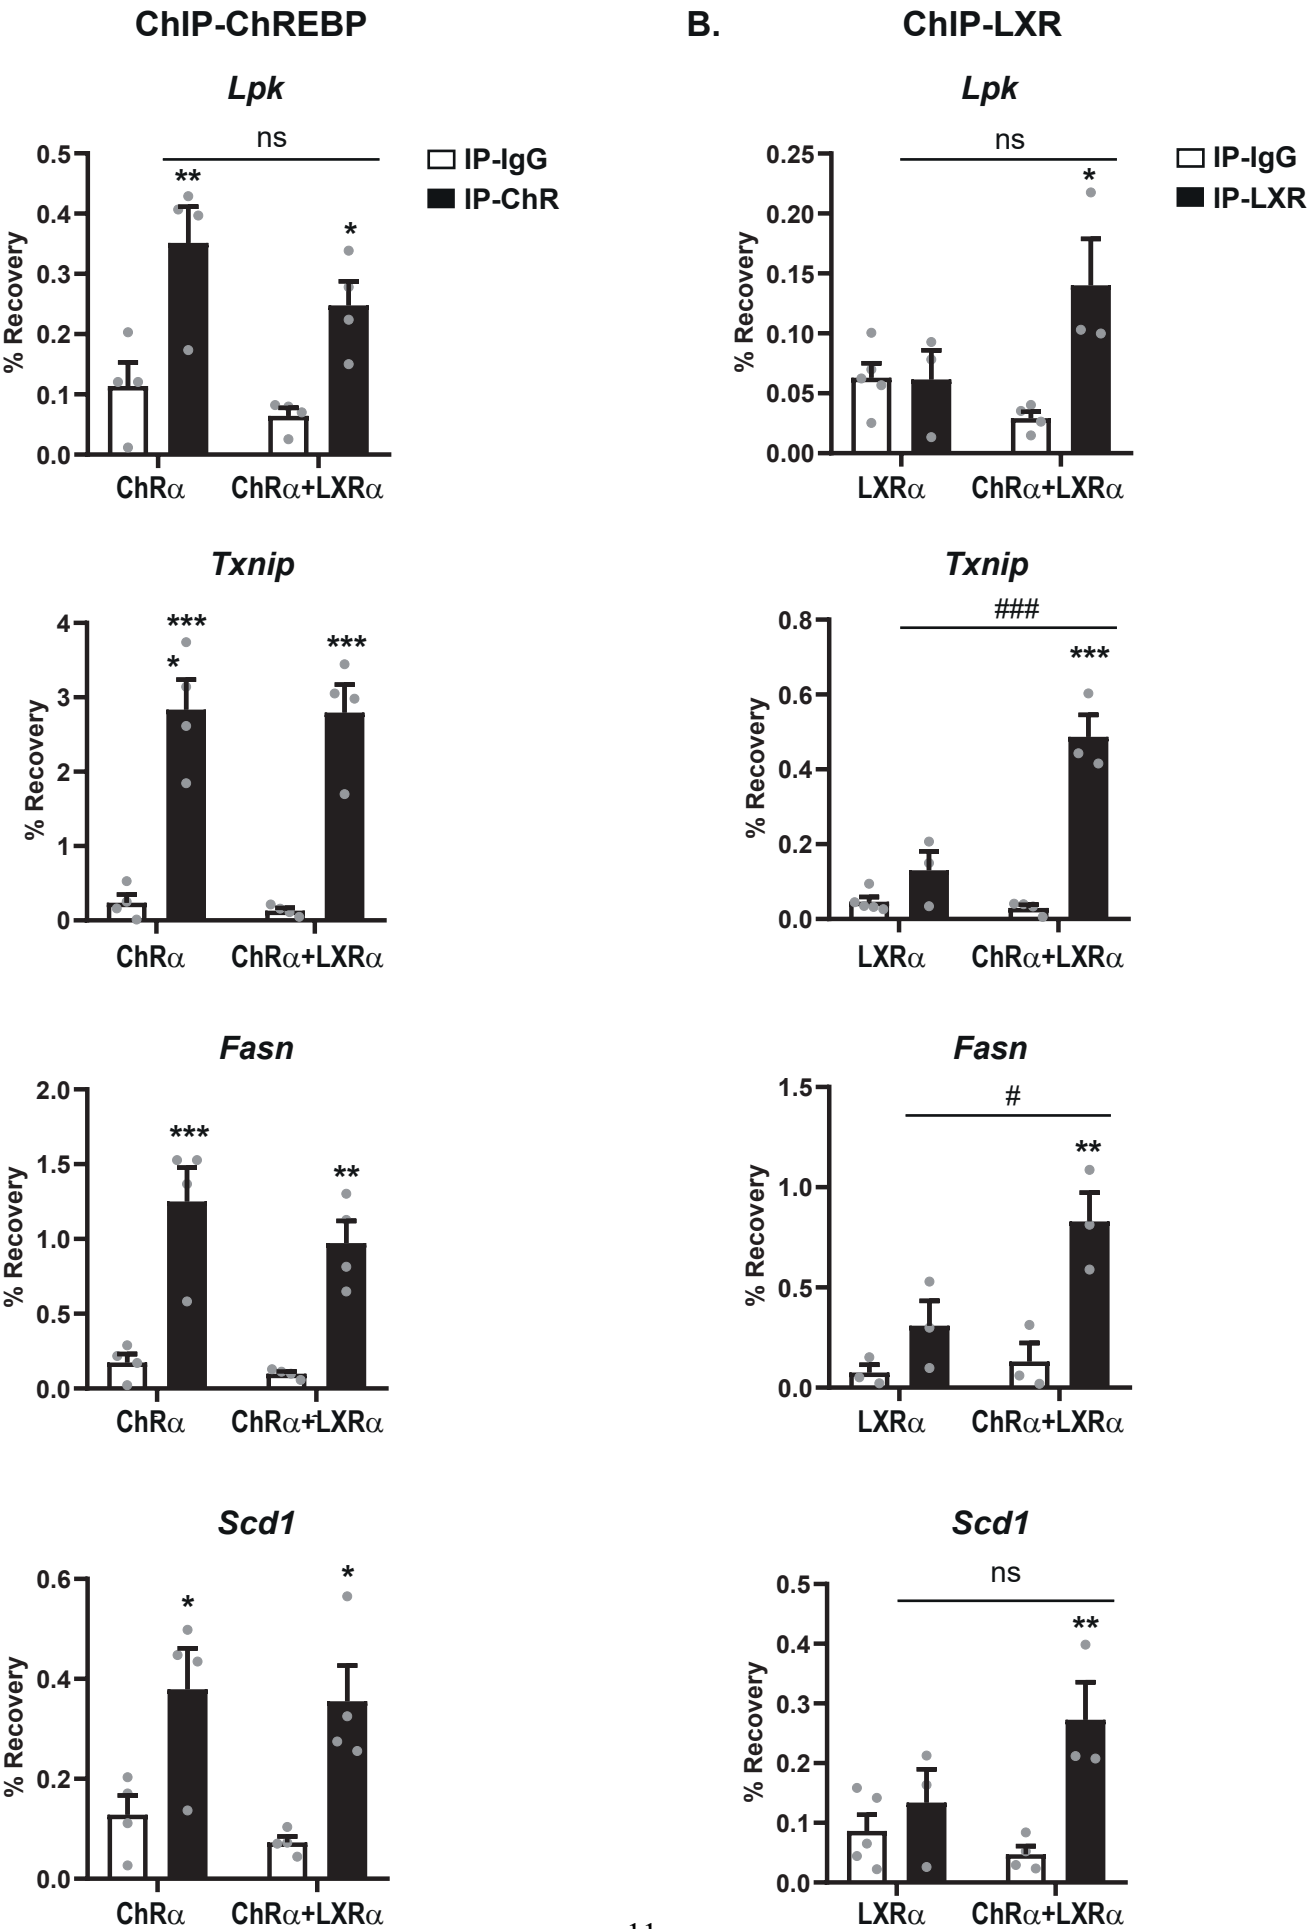

### Supplemental Figure S6.

AML12 cells were transfected with ChREBP $\alpha$ /Mlx $\gamma$  and/or LXR $\alpha$ /RXR $\alpha$ . Recruitment of (A) ChREBP or (B) LXR to the promoter region (indicated in Figure 6A left panel) of the genes *Lpk* (*Pklr*), *Txnip*, *Fasn* and *Scd1* were detected by ChIP using antibodies against ChREBP, LXR or IgG as negative control. Data are presented as mean  $\pm$  SEM (n=3-5). Significant differences are shown as \*p < 0.05, \*\*p < 0.01 compared to ChIP-IgG. ns, not significant.
